# Supplementary material for: Analysis of 62 hybrid assembled human Y chromosomes exposes rapid structural changes and high rates of gene conversion
Source: PubMed Central journal article supplement (PMC5591018; doi:10.1371/journal.pgen.1006834), 2017-08-28

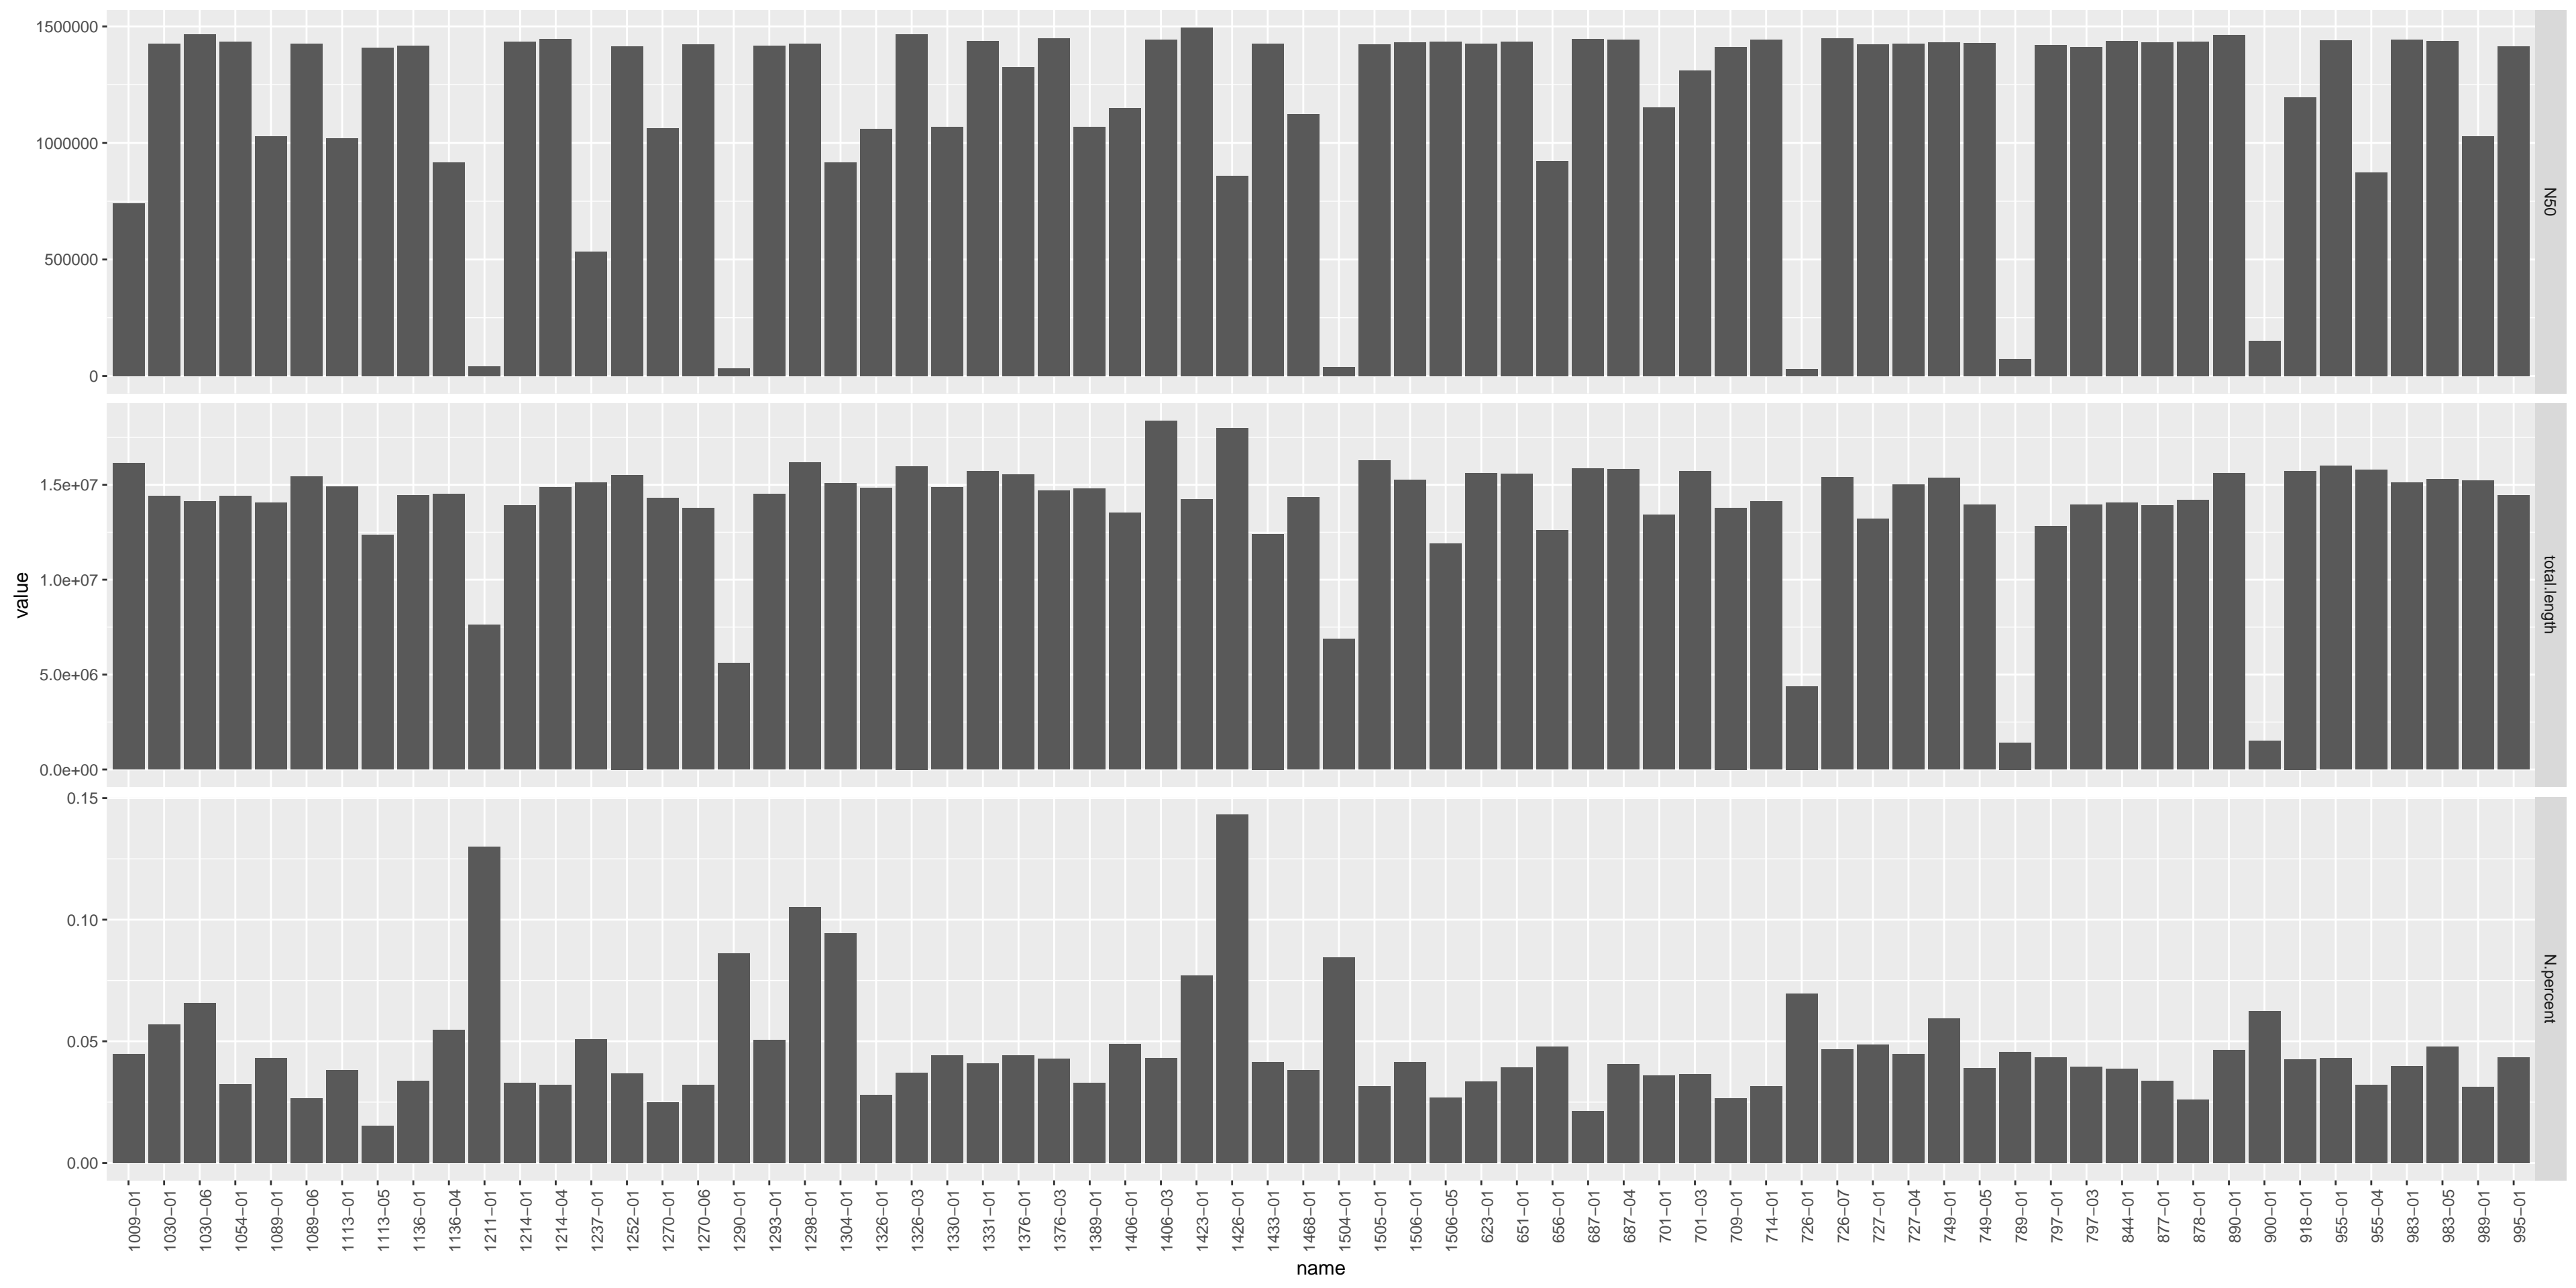

Supplement: pgen.1006834.s006.pdf [file pgen.1006834.s006.pdf]
