# Supplementary material for: Analysis of 62 hybrid assembled human Y chromosomes exposes rapid structural changes and high rates of gene conversion
Source: PubMed Central journal article supplement (PMC5591018; doi:10.1371/journal.pgen.1006834), 2017-08-28

# Evolutionary relationship between samples in this study and the outgroups used

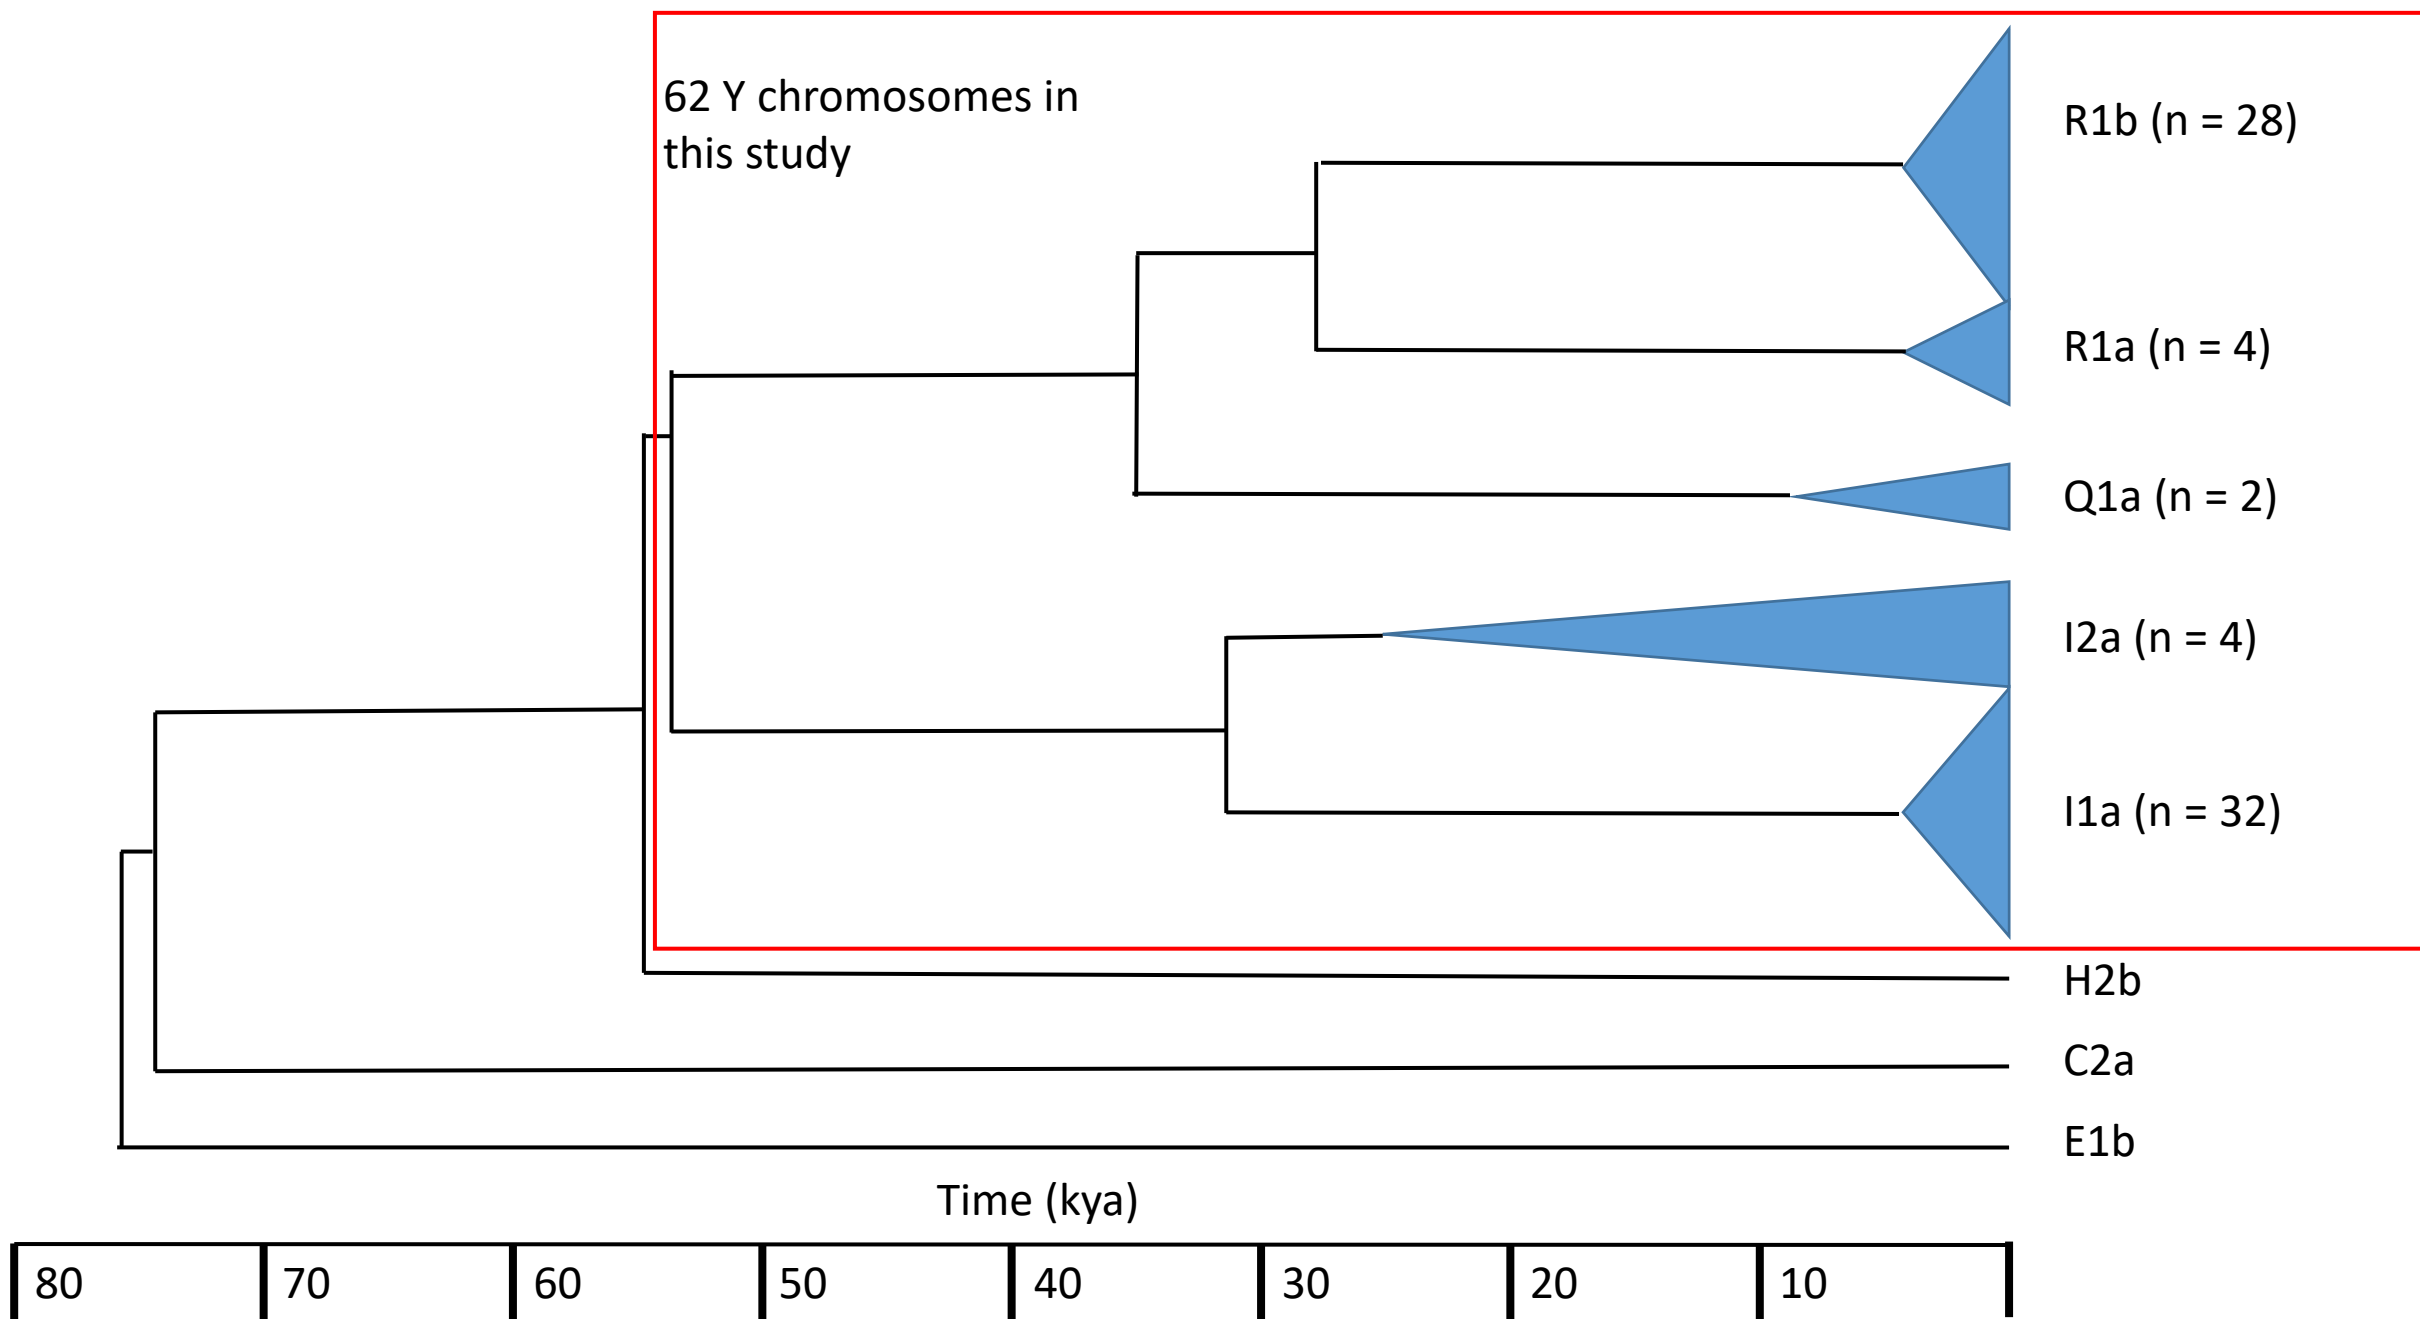

Supplement: pgen.1006834.s009.pdf [file pgen.1006834.s009.pdf]
